# Supplementary material for: Childhood attention-deficit/hyperactivity disorder
Source: HighWire-hosted journal article supplement (doi:10.1136/bmj.h2168), 2015-05-20
Supplement: bmj.h2168.pdf [file bmj.h2168.pdf]

## 儿童注意缺陷多动障碍

### Childhood attention-deficit/hyperactivity disorder

来源:BMJ 2015;350:h2168 doi: 10.1136/bmj.h2168

注意缺陷多动障碍(ADHD)是儿童时期第二大最常见的精神障碍<sup>1</sup>。2010年全球性疾病研究表明,儿童ADHD在全世界范围内的点患病率为男性2.2%、女性0.7%<sup>2</sup>。但是,对于ADHD的诊断和治疗,不同的国家和地区各不相同,这种不确定性成为ADHD管理的一大特点。

ADHD表现为持续存在的注意力不集中、活动过度、冲动症状。ADHD患儿常常被贴上负面标签,又或者在学校和家庭里被特殊对待。因为他们很难做到注意力集中、安静地坐着或者做事先思而后行,这就导致他们面临传统课堂上的学习和表现的挑战。另外,他们的社会交往也很困难,不能被同龄人所接受<sup>3</sup>,或者和父母的关系很紧张<sup>4</sup>。以上这些特点会产生二次负面影响,如很有可能导致学习成绩差或者被学校开除、药物滥用以及触及刑

#### 你必须掌握

- 儿童注意缺陷多动障碍(ADHD)的诊断是指在多种场合下,由于持续存在的注意力不集中、活动过度 and 冲动而导致多种损害。
- 相关的问题包括品行障碍、学习困难和孤独谱系障碍。
- 社会心理干预,如家长培训和课堂干预,对于参与学校课程以及与家人和同伴的关系、提高自尊有重要作用。
- 药物可以改善ADHD的核心症状、学校表现和同伴关系,选择专科诊所与初级保健相结合,从而对治疗进行监测是最好的选择。
- 在世界的某些地区,ADHD的诊断和药物治疗的比率急剧增加,需进一步进行完善。

Nienke Verkuijl  
specialty trainee<sup>1</sup>,  
Marian Perkins  
consultant<sup>2</sup>,  
Mina Fazel  
NIHR postdoctoral  
research fellow<sup>1</sup>  
consultant<sup>3</sup>

<sup>1</sup>Department of  
Psychiatry,  
University of Oxford,  
Oxford OX3 7JX, UK;  
<sup>2</sup>Child and  
Adolescent  
Neuropsychiatry  
Service, Oxford  
Health NHS  
Foundation Trust,  
Oxford, UK;  
<sup>3</sup>Children's  
Psychological  
Medicine, The  
Children's Hospital,  
Oxford University  
Hospitals NHS Trust,  
Oxford, UK

Correspondence to:  
M Fazel  
mina.fazel@  
psych.ox.ac.uk

#### 来源与选择标准

我们在PubMed上检索了从2004年1月至2013年12月(更新到2014年12月)期间对注意缺陷多动障碍(ADHD)的流行病学及药物和非药物治疗进行的荟萃分析、系统性综述和随机对照试验研究,阅读了由英国国家健康与临床优选研究所、ADHD欧洲指南、美国儿科学会和美国儿童与青少年精神病学会制定的关于ADHD的国家和国际指南。本综述进一步加入了一些里程碑式的研究结果,也加入了一些专家的意见。

事问题(图1)<sup>5-8</sup>。

ADHD是具有相当多的争论和争议的疾患。数据表明<sup>9</sup>,鉴于在医疗行业和其他方面的精神兴奋剂的滥用,一些地区的过度诊断成为一个问题。然而,如果有严重ADHD症状却未被诊断和治疗,对患儿和家庭的负面影响也是不可轻视的。尽管患儿的功能长期都低于正常同龄人,但是相比较未治疗的患儿而言,行为干预和药物治疗都能改善ADHD患儿的症状<sup>7</sup>。

这篇综述旨在为临床医生提供一份基于ADHD的评估和治疗管理的回顾性分析的证据。本文还讨论了有关ADHD在学术文献和大众科学之间产生矛盾的

牛曼曼  
韩颖译  
北京大学  
第一医院儿科

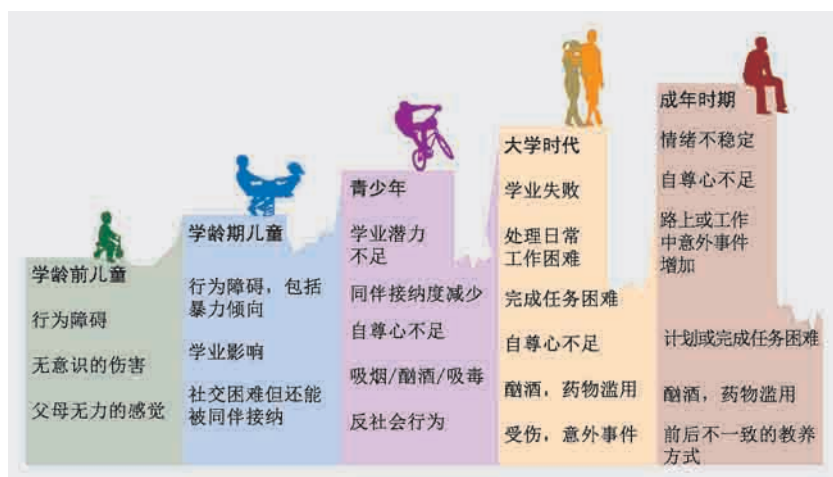

图1 注意缺陷多动障碍(ADHD)对发育的可能影响

驱动因素, 尽管对这些问题的综合评估已经超出了本文的范围。

### 引起ADHD的原因是什么?

ADHD是由遗传因素和非遗传因素共同作用引起的<sup>10</sup>。对双胞胎的研究表明, ADHD的遗传性高达70%~80%<sup>11</sup>。ADHD与多个基因相关, 其中一些是精神障碍疾病中的常见基因<sup>12</sup>, 这些基因与多巴胺和五羟色胺途径有关。另外与ADHD有关的因素还包括母孕期酗酒、母孕期药物滥用、低出生体重、早产、营养不良、暴露于环境毒物和儿童早期的社会心理问题等。

### 目前关于ADHD的争论和争议是什么?

ADHD的诊断和治疗已经引起了包括医疗和教育行业<sup>13-15</sup>、媒体和大众在内的很多行业的争论<sup>16</sup>。ADHD是正常行为分布范围的一个极端, 那么由此产生了一个主要的论点, 即ADHD到底是不是一种障碍? 如果是, 它的诊断标准是什么<sup>15, 17</sup>? 有人提出, 关于家庭、双胞胎和领养儿童的大量研究都表明, ADHD有很高的遗传性<sup>17</sup>。对双胞胎的研究一致表明, 同卵双胞胎的ADHD遗传率约为80%, 异卵双胞胎的遗传率约为40%<sup>10, 18-20</sup>。这些是引起争论之所在。

### 患病率和治疗率的变化

全球的患病率和治疗率的变化值得关注, 而且在精神疾病诊断方面已经产生信心危机<sup>21-22</sup>。其中美国和英国有2项研究着重强调了这一变化, 两者

都探讨了患儿父母关于ADHD的诊断报告。美国报道, 自2003年11月以来, ADHD的诊断率增加了42%, 目前ADHD的患病率为8.8%<sup>23</sup>。英国的研究报道, ADHD的患病率为1.7%, 从1999到2009年患病率没有增加<sup>1, 24</sup>。在美国共有6.1%的ADHD患儿接受药物治疗, 相比之下, 英国只有0.8%的患儿接受了治疗<sup>25</sup>。

### 地区

在某些地区的流行病学研究中, 诊断过度和诊断不足是引起争议的另一原因。美国大烟山的一项纵向研究证明了这一点。他们筛选出4 500个孩子, 采访观察他们的行为问题, 同时从家长和老师那里收集报告, 以确定ADHD患儿。尽管有7.3%的孩子正在服用精神兴奋性药物, 但发现仅有3.4%的孩子患有ADHD<sup>9</sup>。有趣的是, 贫穷的孩子中只有不到一半的患儿接受了药物治疗。

### 行为的期望

目前ADHD的诊断框架不可避免地遗忘了一个主观因素, 即确定机体功能受影响的程度。由此导致了ADHD诊断的一个“模糊地带”<sup>13-14</sup>。这种来自于家长、老师和临床医生的判断受到他们对孩子行为期望值的影响<sup>14</sup>。近期的研究也提出了这一问题, 在某些国家和社会经济组织, 兴奋剂被滥用。因为有数据表明, 与正常对照组相比, 兴奋剂作为年轻人的认知增强剂被滥用<sup>26-28</sup>。医生的作用是明确找出这些孩子, 他们由于注意力缺陷而导致了机能受损, 而通过药物治疗及平衡药物的作用和不良反应后, 可以从中受益。

### 分类

有2个不同的诊断分类体系, 即国际疾病分类(ICD)和精神障碍的诊断和统计手册(DSM)。因为它们分别应用了不同的诊断项目和标准来诊断ADHD, 可能导致患病率出现变化。当标准改变时, 如最近DSM-IV变成DSM-5, 这一变化使得各个研究结果之间难以进行相互比较<sup>14, 24, 29</sup>。DSM主要在北美应用, 也广泛应用于研究中。而ICD-10大多应用于除美国外的其他国家的临床。DSM-5与前几版相比, 运用了“ADHD”这一词, 并对这种障碍的分类做

了几次修改。然而,ICD-10并没有用“ADHD”这一词,而是用了“多动障碍”一词,这一词等同于ADHD的严重阶段。另外国际方面想要通过努力,使这两个主要的诊断分类体系统一起来<sup>30</sup>。

### 参与的行业

经济利益和约束导致了各种因素之间复杂的相互作用。据报道,制药企业引起目前的诊断过度<sup>21-22</sup>。此外,许多研究者和患者支持团体以及37%的网站得到了制药企业给予的ADHD相关拨款<sup>31-32</sup>。在美国,治疗ADHD的药物被大肆宣传,并且允许制药公司直接向潜在消费者和老师宣传,这也会硬性增加消费率<sup>33</sup>。对行为和心理治疗的限制会导致医生和家长在ADHD的管理上更早地选择应用药物。另外,医疗保险退还治疗费用也需要一个诊断证明<sup>14</sup>。

### 证据强度

关于药物治疗,能得到可靠结论的高质量研究很少。这一问题并不是只针对ADHD,还有很多其他的儿童精神病药物,反映出在资金提供方面和在理想的实验模型下研究儿童群体的困难<sup>34</sup>。可以从包括ADHD的自然进展和有关药物治疗的大量问题,如长期疗效中,得到更强有力的证据。纵向研究表明,与其他患儿相比,接受药物治疗的患儿可能从药物治疗中获益<sup>35</sup>。

### 怎么评估和诊断?

#### 诊断的制定

每个国家在规定谁来做出ADHD诊断上有很大的不同。许多国家,比如美国和荷兰,允许基础医疗的医生来做诊断。而另一些国家,比如英国,允许儿科医生和儿童精神病学家来对疑似的ADHD确诊<sup>36-37</sup>。

ADHD的3个核心症状是注意力不集中、活动过度、冲动。这些症状最常出现于儿童在完成家庭作业的时候,表现出毫无秩序。这些孩子经常被描述为忙个不停,而且对危险的意识性很差。因为这些孩子经常高度活动、很少注意别人的感受、易冲动、维持一个游戏或对话很

难超过几分钟,所以这些孩子的社交能力也有问题。他们很容易受欺负,或者被别人怂恿做一些愚蠢的事情让自己惹上麻烦。父母尤其是母亲经常会为孩子的一些行为感到自责,所以他们就勉为其难的去寻找医生帮助或者渴望得到诊断<sup>38-40</sup>。孩子可能会偷听到一些对他的负面评论,比如这是一个大难题或者表现是最差的,等等,这些都会潜在地影响他们的自尊(图2)。

在这个阶段最重要的就是排除可能导致相似表现的其他疾病,如:睡眠、听力、视力问题。行为问题是造成家庭和学校重大压力和破坏的严重问题。如果排除了其他原因,行为问题已经造成中等及以上伤害,建议遵照专家的意见做出一个诊断。年幼的孩子会表现出在学校里学习困难(通常男孩更多一点),极端情况下会被学校开除<sup>6</sup>。而女孩更多的是注意力缺陷,一般直到长大些发现学习需要更多的注意力时才会被诊断为ADHD。转诊到二级保健机构很大程度上得益于其他的多学科的参与,比如来源于教育界的专业工作人员,像老师、教育心理学家、牧师等。给等待专家评估的11岁以下的孩子家长推荐育儿教程是可行的<sup>36、41</sup>。专家在建议育儿课程时应小心谨慎,避免让家长感到专家正在暗示自己育儿技巧很差,而是应该强调有这方面困难的孩子会从此类课程中获益。

框图1叙述了诊断ADHD的DSM-5标准。详细的病史和检查对于准确的诊断、评估相关疾病和共患病是必须的(框图2)。

另外,使用诊断标准进行核心症状的询问,临床问诊应该包括:

- 告知问题所在、疾病过去史和现在的机能状态。

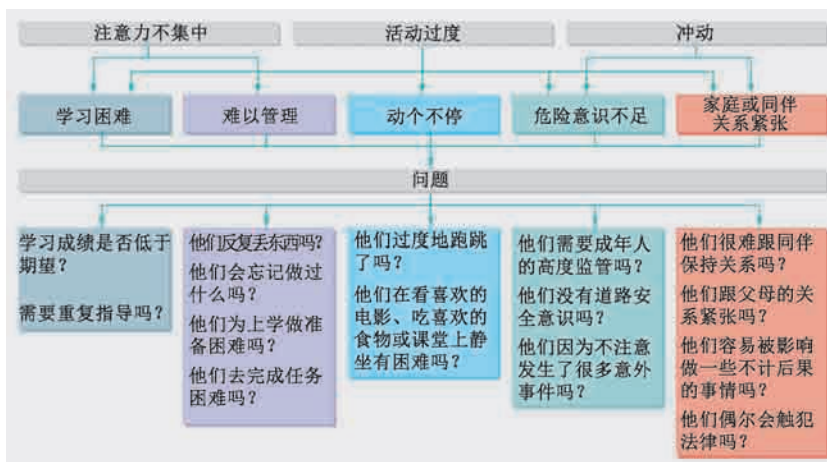

图2 如何评估儿童注意缺陷多动障碍(ADHD)

也需要考虑到孩子的症状和包括承担风险的一些常见问题。

- 怀孕、生产史、早期神经发育史(包括发育里程碑、语言、依恋、睡眠、喂养问题、早期的气质、社会交往的发展)。
- 病史(包括抽搐、癫痫、心脏症状、粗略和精细运动技能、视觉、听觉)、用药史和家族病史,特别是心脏病史,如40岁之前突然死亡或在运动中死亡的家族史。
- 评估在学校、家庭或者社会环境中机能受损的整体水平(儿童的总体评估量表是一个很好的验证工具)<sup>54</sup>。

标准化问卷被普遍运用于评估和管理ADHD。如果患儿表现出学习和交流困难,进行心理评估是有用的。染色体分析和功能性脑成像不例行推荐。

## 怎么治疗ADHD?

对于ADHD患儿的管理要基于对他们当下面临的困难、社会情感需要、家庭环境和教育环境的

### 未来需要研究的问题

- 药物治疗的最佳持续时间和长期影响是什么?
- 什么是注意缺陷多动障碍(ADHD)课堂管理的最佳策略,以及如何实施?
- 父母的培训是单独进行更好,还是群体进行更好?怎样进行对治疗更有效?
- 治疗可以针对特定亚型的ADHD进行吗?
- 对学业不良的学龄期儿童进行ADHD及其相关共患病的筛查有意义吗?
- 在ADHD的治疗管理上,游戏、应用程序和数字媒体是否有作用?
- 当儿童成长为成人时,ADHD的远期结局是什么?对于成人,最好的治疗是什么?

### 患者如何参与本文创作

我们从患注意缺陷多动障碍(ADHD)的儿童、青少年、年轻人和他们的父母中得到关于医疗保健的数据,其中一些数据作为本篇文章中对药物和照护的观点提供必要信息的一部分。对于孩子和家长的反馈意见,这篇文章做了一些改变,把重点更多地放在不同的治疗和不同药物上,因为这些是目前仍不确定的共同领域。

## 框图 1 注意缺陷多动障碍(ADHD)的DSM-5诊断标准<sup>67</sup>

诊断需要在每项中有6个或更多的症状

### 注意力不集中

- 犯粗心的错误
- 在做任务或游戏中难以维持注意力
- 在对其讲话时,似乎没有听
- 不遵循指令,不能完成作业
- 组织任务和活动有困难
- 逃避需要持续注意力的任务
- 丢失工作或活动所必需的东西
- 容易分心
- 健忘

### 活动过度和冲动

- 坐立不安,或在座位上乱动
- 在需要呆在座位的情况下离开座位
- 在不适当的情况下过多地奔跑或攀爬
- 在休闲活动中,不能安静地玩耍
- 说话过多
- 动来动去,像安了马达一样
- 排队时很难等待
- 问题还没问完之前答案脱口而出
- 打断或打扰别人

### 症状

- 至少持续6个月的时间
- 在12岁之前出现症状(如果≥17岁,确诊只需要在每个类别中有5个症状)
- 至少在2个环境中出现症状(例如,在学校、家里、与朋友相处时,或其他活动中),且症状导致社会或学校的机能水平受到损害
- 环境适应不良或与发育水平不一致
- 无法用其他精神障碍更好地解释

充分理解<sup>36,47</sup>。要基于功能严重损害对孩子的终身影响,考虑不同年龄对药物的不同需要。在这个关键时期,通过管理行为和家庭策略对孩子进行管理,也许还可以加上药物的作用。重要的是,在某些家庭,因为父母曾患有未被诊断的ADHD,所以对ADHD患儿进行管理是很复杂的<sup>25</sup>。外在的支持系统给家庭提供越来越多的教育、社会服务、志愿部门或社区以及医疗保健。

虽然全球范围内关于ADHD的综合评估框架基本一致,但是由于如上所述的原因,心理干预与药物干预相比何者优先,各个国家各不相同。英国的ADHD指南与欧洲、美国的指南大致相同,建议进行

## 框图2 注意缺陷多动障碍(ADHD)共患病及相关疾病

### 对立违抗性障碍和品行障碍

对立违抗性障碍(挑衅和攻击行为)和严重行为障碍,经常与ADHD共存<sup>42</sup>,区分这两种疾病是很困难的,因为ADHD患儿的易冲动性,往往表现为攻击行为。仔细梳理出ADHD的核心症状将使之区分清楚。

### 孤独谱系障碍

患病率因评估方式不同而有所不同。已经报道ADHD共患孤独谱系障碍的患病率为20%~50%<sup>43</sup>。筛查中有些问题,如患儿能不能欣赏另一个人的观点,是必不可少的。

### 抽动障碍

与对照组相比,患有ADHD的儿童患抽动障碍的风险增加<sup>42</sup>。

### 运动协调性差

ADHD常常伴有运动行为发展落后、书写困难、笨拙、运动力差<sup>44</sup>。

### 特定的学习困难

失读症一般与ADHD相关。ADHD患儿的阅读理解能力下降;与工作记忆缺陷有关<sup>45</sup>。

### 睡眠障碍

睡眠障碍是ADHD常见的共患病<sup>46</sup>,但往往被忽略。明确是由原发性睡眠障碍导致的注意力集中问题,还是因为ADHD共患的睡眠问题很重要。过去史排除阻塞性睡眠呼吸暂停综合征也很重要。

### 情绪障碍

焦虑和抑郁往往伴随着ADHD<sup>42</sup>,这些症状可能与ADHD有关,或与其存在的人际关系问题有关。

### 早期逆境

早期儿童关系的长期破坏可导致情感障碍。这些可能呈现为对成年人和同龄人的任意行为和类似于ADHD的注意力不集中<sup>47</sup>。然而,有情感障碍并不排除ADHD。在罗马尼亚孤儿的案件中,孩子们经历了极端的剥夺制度,注意力不集中、活动过度和情感障碍问题发病率都显著增加<sup>48</sup>。但非极端的剥夺制度是否与ADHD有关尚不清楚<sup>49</sup>。

### 双相情感障碍

有争议的研究表明,双相障碍和ADHD共患率很高<sup>50-51</sup>,尚没有达成治疗的共识。

### 物质滥用

目前几乎四分之一的ADHD患儿在成年期发生物质滥用<sup>52</sup>。物质滥用往往从青春期开始。

### 胎儿酒精综合征

ADHD的症状可在胎儿酒精综合征看到,而且ADHD药物对其多动症状有效<sup>53</sup>。

家长培训和行为干预项目<sup>36</sup>。对于6岁以上的症状严重的ADHD患儿,建议药物治疗的同时辅助心理干预治疗。推荐开始用药的时候,应做如下检查:

- 体格检查——心脏检查排除任何明显的异常,应记录基础脉搏、血压、身高、体重。
- 实验室检查——心电图上是否有临床的或家族的严重心脏病,家族史上有没有年轻的家庭成员突然死亡,心脏检查结果有没有异常发现。血液检测不常规推荐。

## ADHD的社会心理干预

许多社会心理干预措施,如家长培训、社会技能培训、认知训练或特定的课堂干预的循证医学证据非常有限<sup>55-59</sup>。2013年对ADHD的非药物治疗采用随机对照试验的系统性综述和荟萃分析结果发现,没有任何证据证明,包括儿童、家长或教师在内的行为干预对ADHD的核心症状有效。当采用父母的非盲法评估时,有一个小的但显著的证据证明,行为干预对ADHD的核心症状有影响<sup>55</sup>。

关于与药物相比的长期行为干预作用,随访了8年的多模式(MTA)ADHD治疗研究,是最大的随机临床试验研究。在该研究中,行为干预的研究很广泛,包括家长、孩子和学校等。药物组由严格的滴定治疗方案组成。治疗14个月后,ADHD的核心症状在药物组改善的程度比行为治疗与常规社区护理组更好<sup>7</sup>。行为干预和药物联合治疗没有比单纯的药物治疗产生更显著的效果,但对非ADHD症状,如社会的相互作用和内化症状有好处。14个月后,这项研究成为了一个自然的观察研究。在24个月(试验完成10个月后)后,那些接受药物和行为干预共同治疗的孩子需要的药物剂量显著降低<sup>60</sup>。然而,在8年的随访中,治疗组之间在行为上没有明显不同,包括学习成绩、刑事拘留、因精神疾病住院治疗或其他相关结果<sup>7</sup>。长期疗效中最积极的预测是,行为和人口统计发现所有的治疗对于ADHD都有好处。

社会心理干预已被证明能够在长期管理和治疗ADHD共患病中发挥重要作用。其通过提高患儿的自尊,改善和同伴及家庭关系,并使他们更容易完成学校课程,从而改善儿童的整体机能表现<sup>59</sup>。

## ADHD的家长培训

虽然荟萃分析和Cochrane综述强调了家长培

训对 ADHD 治疗的证据不足,但许多家长仍可从家长培训中受益<sup>55,57</sup>。在英国,NICE 指南推荐家长培训作为 3~11 岁儿童的一线治疗手段<sup>36</sup>。家长培训,如在新森林育儿计划<sup>61</sup>(聚焦 ADHD)和年计划(广泛的行为焦点)中,包含了心理教育和技能培训<sup>57,62</sup>。家长培训通常是基于团体,并且强调了 3 个方面<sup>63</sup>:

专注于明确想要的行为——这可以通过表扬和奖励,而不是通过批评不必要的行为,如告诉孩子坐下来,而不是对他们喊着(忽略了尖叫和发脾气)不要再淘气了。可以通过这种活动,如游戏,建立一个更积极的关系。

为家庭制定明确的规则——这个规则应该是明确的、简洁的、父母一贯执行的。不服从和触犯需要坚定而冷静地处理,如:暂时让孩子关禁闭。

预见一天中潜在的困难时段——在忙碌的家庭生活中,这就需要主动放置结构、分散注意力或者在这些时间进行不同的活动,如:从学校回来等关键时期。

### 社会技能训练

社会技能培训包括学习在社会中适当应用语言和非语言交际、理解如何分享和轮流、去了解和认识他人的情感。最近的 Cochrane 综述报道,对 5~18 岁 ADHD 儿童进行的社会技能训练没有发现支持或反对的证据<sup>56</sup>。这可能是由于儿童 ADHD 的缺陷不是社会知识的缺乏,而是行动之前缺乏对这种行为所引起的后果的思考<sup>64</sup>。

### 认知训练和认知行为治疗

认知训练包括注意力和记忆(它们通常被认为是“执行功能”的一部分)的训练。关于 ADHD 认知训练的双盲、随机对照研究的系统性综述和荟萃分析没有发现有效的证据<sup>55</sup>。关于认知行为治疗(CBT),2010 年的文献回顾研究发现,没有研究表明 CBT 对患儿的 ADHD 症状有效<sup>58</sup>。然而,随后的非随机对照试验数据表明,CBT 可能对接受药物治疗但仍有遗留问题的青少年 ADHD 有效<sup>65</sup>,对共患焦虑、抑郁、行为障碍或对立违抗性障碍的青少年效果更好。

### 课堂干预

在传统的教育环境下,ADHD 儿童可以努力控制自己的行为,在学业上取得成绩,处理好与同伴

的关系<sup>64</sup>。虽然环境因素、学生认知和教师均对研究结果有重要影响,仍有证据表明学校干预具有积极作用<sup>66</sup>。在管理 ADHD 儿童方面,对老师提建议是有用的,如宣传态度和行为的正面影响,但不过于强调学习成绩<sup>67</sup>。课堂策略中有效的方式,包括给学生一个、两个或多个同时进行的课堂活动;如果有注意力分散,让学生坐在老师旁边<sup>64</sup>,以便未完成任务和指令可以受到敦促;行为表现好立即给予奖励(贴纸或分点),未完成则给予小小的惩罚<sup>68</sup>。老师使用日常报告卡,以提高教师和家长的配合<sup>66</sup>。一项深入的干预研究表明,某些类型的运动,如坐在一个活动的球上,可以帮助患儿集中注意力;相反,如果只关注这样的活动本身,有可能加剧注意力不集中<sup>69</sup>。一个班级同伴的辅导会有积极影响<sup>70</sup>。没有证据表明,课堂社交技能训练有助于 ADHD 患儿与同伴的交往<sup>36</sup>,但通过同伴的调解解决冲突却与全校范围内操场暴力和负面互动的减少有关<sup>71</sup>,例如班级范围内的干预——减少分心——可能是把错误降到最低的措施<sup>66</sup>。

### 饮食建议

所有的孩子,包括 ADHD 患儿,都需要强调健康、均衡的饮食和经常运动的重要性。如果过去史表明某些食物有负面影响,通过食物日记就可以帮助确定其中的联系。在 NICE 建议中,如果明确某些食物与行为问题有关,营养师和治疗专家共同决定排除某些特定的饮食<sup>36</sup>。一个非盲的随机对照试验发现,使用“排除饮食法”减少某些食物,逐渐扩增其他食物,没有接受药物治疗的儿童 ADHD 症状也会减少<sup>72</sup>。然而,尽管排除了人工食品色素对 ADHD 症状具有中度的正效应,但随后的采用盲法随机对照试验的系统性综述和荟萃分析发现,排除性饮食的有效性证据不足<sup>55</sup>。作者认为,儿童在排除性饮食和排除人工食品色素的试验中往往在预选的基础上对某些类型食物有敏感性,所以阳性结果可能仅适用于有疑似敏感食物的儿童<sup>55</sup>。游离脂肪酸的补充可以使一些 ADHD 患儿受益,同一个随机对照试验的荟萃分析证实效应值为 0.3 左右,这是很显著的,但明显小于药物的效应值(为 0.7~1)<sup>55</sup>。表 1 总结了非药物治疗用于 ADHD 治疗的证据。

### 药物

药物可改善 ADHD 的三大核心症状:注意力不

**表1 非药物治疗注意缺陷多动障碍(ADHD)的证据**

| 治疗方法     | 证据水平 | 证据                                 |
|----------|------|------------------------------------|
| 家长培训     | 1*   | 证据不足 <sup>55</sup>                 |
| 认知训练     | 1    | 需要进一步的证据 <sup>55</sup>             |
| 认知行为疗法   | 3*   | 接受药物治疗的ADHD青少年显示有效 <sup>65</sup>   |
| 社会技能训练   | 1    | 证据不足 <sup>56</sup>                 |
| 补充游离脂肪酸  | 1    | 小而显著的影响,临床意义有待确定 <sup>55</sup>     |
| 排除人工食物色素 | 1    | 统计学意义显著,对ADHD症状有一定效果 <sup>55</sup> |
| 限制排除饮食   | 1    | 证据不足 <sup>55</sup>                 |

注:证据水平来自牛津大学循证医学中心,2011年

\*证据来自随机对照试验的荟萃分析

\*证据来自非随机对照队列研究

集中、活动过度、冲动<sup>36</sup>。一项随机对照试验证明药物使用可以在短期内改善症状和功能。如上所述,药物治疗可以改善注意力<sup>27-28</sup>,所以药物被认为能改善表现,而不是作为ADHD神经病理学特定的治疗手段<sup>34</sup>。

ADHD的临床有效药物主要有两类:一类是兴

奋剂,可增加中枢神经系统的多巴胺和去甲肾上腺素,如:哌甲酯和右旋苯丙胺;另一类包括去甲肾上腺素再摄取抑制剂,如:托莫西汀。根据患儿的需求、药物结构、短效到缓释成分的比例、不良反应及花费等选择药物(表2)。

一项随机对照试验的系统性综述表明,兴奋剂和托莫西汀可以改善ADHD的核心症状,提高生活质量。虽然对右旋苯丙胺的研究仍有局限性,但哌甲酯已经很有名气<sup>73</sup>。但是哌甲酯的短期和长期作用被认为是一样的<sup>74</sup>。哌甲酯的总体效果估计值为1.0<sup>75</sup>,托莫西汀为0.7<sup>76</sup>。其他研究中有报告称,治疗ADHD需要服用哌甲酯3粒(缓释片)、托莫西汀5粒<sup>74</sup>。少数研究探讨了儿童ADHD接受药物治疗的效果。如一个小样本的研究报告,ADHD患儿服用药物治疗后多数有效。表现为患儿用药以后与同龄人之间的关系改善,减少了破坏性行为<sup>36</sup>。药物较为常见的不良反应包括恶心、头痛、睡眠问题、心率和血压的轻微增加,并有食欲下降、体重下降、身高增长减慢。框图3提供了更多的细节<sup>77</sup>。

**表2 治疗注意缺陷多动障碍(ADHD)的药物及剂量<sup>86</sup>**

|                    | 右旋苯丙胺          |                              | 哌甲酯                  |                          |                         |                 | 托莫西汀<br>(择思达,<br>礼来,美国)    |
|--------------------|----------------|------------------------------|----------------------|--------------------------|-------------------------|-----------------|----------------------------|
|                    | 片剂             | 二甲磺酸赖右苯丙胺(Shire,英国)<br>胶囊可溶性 | 利他林(诺华,瑞士)<br>或盐酸哌甲酯 | Medikinet XL<br>(麦迪思,德国) | Equasym XL<br>(优时比,比利时) | 专注达<br>(杨森,美国)  | 片剂                         |
| 剂型                 | 片剂             | 胶囊可溶性                        | 片剂*                  | 胶囊*                      | 胶囊**                    | 片剂              | 胶囊                         |
| 哌甲酯即刻释放和延长释放的比率    |                |                              | 100%即刻释放             | 50%即刻释放,50%延长释放          | 30%即刻释放,70%延长释放         | 22%即刻释放,78%延长释放 |                            |
| 时间(小时)             | 4              | 13                           | 4                    | 8                        | 8                       | 12              | 24                         |
| 滴定,起始剂量            | 2.5 mg, 2~3次/天 | 30 mg                        | 5 mg 1~2次/天          | 5~10 mg                  | 10 mg /天                | 18 mg/天         | 体重<70 kg的患儿,每天0.5 mg/kg,7天 |
| 滴定,每周增加剂量          | 5 mg/天         | 20 mg                        | 5~10 mg              | 10 mg                    | 10 mg                   | 9~18 mg         | 最多每天1.2 mg/kg              |
| 30 mg 盐酸哌甲酯的等效剂量   | 15 mg          |                              | 30 mg                | 30 mg                    | 30 mg                   | 36 mg           | NA,必须依照托莫西汀的用法             |
| 每日服药次数             | 2~3            | 1                            | 2~3                  | 1                        | 1                       | 1               | 1次或分成2次                    |
| 每天最大剂量             | 20 mg          | 70 mg                        | 60 mg                | 60 mg                    | 60 mg                   | 54 mg           | 体重<70 kg的患儿,每天1.8 mg/kg    |
| 控制药品               | 是              | 是                            | 是                    | 是                        | 是                       | 是               | 否                          |
| 30片的价格(英国2015年的价格) | 26英镑(5 mg)     | 62英镑(30 mg)                  | 5.50英镑(10 mg)        | 25英镑(10 mg)              | 25英镑(10 mg)             | 31英镑(18 mg)     | 67英镑(10 mg)                |
| 其他                 |                | 在欧洲授权用于那些对哌甲酯反应不好的患儿         |                      |                          |                         | 成年人可以使用         |                            |

注:\*可以压碎放在水里马上喝掉

\*可以洒在苹果酱或酸奶汤匙上(不用咀嚼,直接吞咽)

\*\*可以洒在苹果酱汤匙上(不用咀嚼,直接吞咽)

NA=不适用

虽然目前有证据表明,神经兴奋剂的治疗在任何时间应用都可以改善患儿的症状和功能,但长期随访研究显示,没有证据证明,兴奋剂的应用对于ADHD患儿的症状和功能具有长期的改善效果<sup>78</sup>。没有一项研究把儿童疾病的不同时期、服用药物的

### 一个年轻人的故事

当我11岁的时候,我才被诊断出注意缺陷多动障碍(ADHD),这时,我们搬家了,我不得不重新上一个学年。我曾在一个结构良好的教会学校表现良好,但来到一个较为松散的学校时,表现开始下滑。我用药物治疗ADHD,并配合如何最好地组织和管理我的时间的辅导。

我不喜欢吃药(哌甲酯)。吃药给我一种无聊的不好感觉,让我觉得我和其他人拉开了距离。我对服药的抗拒引起了我和母亲之间的冲突。她想把最好的给我,给我买了一个精美的、有5个单独报警系统的手表,帮助我记得吃药。

在后来的学校,我学会了管理我的ADHD症状:我用天然的兴奋剂,如咖啡,开始冥想,并参加了集中注意力的运动,如划船。这些做法,配合我学会的时间管理,帮助我度过了中学时光。在大学里,我采用饮食治疗,放弃了服用药物。截至现在,我被诊断为ADHD已经有17年了。虽然我知道吃药对我研究生期间的学习是有帮助的,但是我还是没有服药。我发现我的组织结构做的很好。当雇主称赞我的组织能力时,我很惊讶。我现在有能力组织管理整个团队和办公室人员。

我的家庭还没有适应我日渐增长的能力。当待办事情具有挑战性时,我会觉得很有趣。如果待办事情不在日程列表上,那么,我很可能不会特别快地完成。如果待办事情在日程列表上,那么我用很短的时间就会顺利完成。

### 一个家长的故事

在我们儿子的最后几年里,我们意识到,正常的学校任务已经成为他面临的主要挑战。虽然他有一个非常忙碌的学校时间管理表,但随着学校的压力增加,我们注意到,他不得不工作到深夜,以跟上他的学业。他的烦躁和拖延已经完全失去控制。这个任务还没有完成,他又开始新的任务。他的思想涣散,他集中注意力不超过10分钟,就要起来吃零食或休息。6个小时后,他仅仅完成任务中的两三项。我们的儿子第一次失去了自尊。他开始注意到他并不像他的同学那样聪明。我记得他告诉我,有时他要盯着一个空白的白墙15分钟,以理清他的思绪。

遵从医嘱,他开始服用专注达。一夜之间,他变得更加专注,他开始有条不紊地开展学习,恢复了正常的睡眠模式。最重要的是,我们的儿子恢复了自尊。

上大学的时候,我们的儿子在没有药物的帮助下,一直努力尝试和克服注意缺陷多动障碍(ADHD)。他开始意识到,当他被迫完成学业要求而非核心能力的时候,他的ADHD症状更加明显。医生建议他选择性地使用专注达来完成更艰巨的任务。医生还帮助他重新构架了他对ADHD这种疾病的看法,她让他把这一疾病作为一个特殊的特点,而不是作为一个障碍。这对他选择美学职业道路有很大的帮助。

依从性、治疗选择的偏倚考虑在内。就药物治疗ADHD有效性的证据而言,应在严重的情况下开始考虑选择药物治疗,即在患儿生活的多个方面受到显而易见的损害的情况下选择药物治疗。选择药物治疗时,要与父母和年龄较大的患儿诚实地讨论治疗的好处和不确定因素,并把可能的不利影响因素考虑在内<sup>35</sup>。

表3 如何管理注意缺陷多动障碍(ADHD)的不同药物

| 药物    | 一般性意见                                                                  | 如何开始                                                                                                | 如何改变剂量或停药                                                    |
|-------|------------------------------------------------------------------------|-----------------------------------------------------------------------------------------------------|--------------------------------------------------------------|
| 短效哌甲酯 | 根据患儿一天中的需求,可以最大灵活性地调整药物。不用药物治疗很困难,但家长可以根据需要自由调整附加剂量。例如,孩子放学后什么时间参加课外活动 | 年幼儿童可以从每天早上5 mg开始,逐渐增加到一个有效剂量。因为一天中所需的剂量不同,可以用同样的方法调整每天下午的剂量                                        | 可直接转换到等效的长效药物(通常稍低于两倍剂量)。停药相对简单,可以快速减少服药剂量。如果用量较大,可以逐渐减量     |
| 长效哌甲酯 | 药物作用的时间可以涵盖学校生活。患儿不需要在学校服用,可能会提高大龄患儿的依从性。根据选择,可以覆盖校园生活或更长时间的其他活动       | 常用于大龄患儿的一线用药,避免了复杂地调整剂量(依从性的负面影响)。治疗应从最低剂量开始,每周到每2周进行重新评估                                           | 可直接从短效药物转换到等效的长效药物(尽量选择较低剂量)。停药相对简单,可以快速减少服药剂量。如果用量较大,可以逐渐减量 |
| 托莫西汀  | 如果父母或孩子想要选择或者对兴奋剂有禁忌证可以考虑。发挥作用的时间更长,会对情绪产生不利影响                         | 如果是从哌甲酯转换为托莫西汀治疗,对ADHD症状和不良反应理想的重新评估要在停用哌甲酯2周以后进行。如果是在学校里换药,可以从学校表现收集信息。如果所有的药物都不能控制症状,那么,再重新用哌甲酯治疗 | 根据用药时间的长短和剂量而定,隔天减量或用2~4周的时间逐渐减量                             |



### 药物治疗的起始、滴定和监测

当由儿童精神科医生或儿科医生进行的二级医疗开始对 ADHD 儿童进行药物治疗和监测时,主要的护理专业人员有一个重要的作用,即在整体治疗计划中,提醒监督专家出现的问题,如不遵守或出现困难、加快现在的治疗计划。NICE 建议(基于有效性、不良反应和成本)把哌甲酯作为严重 ADHD 的一线治疗药物,其次是托莫西汀,然后是右旋苯丙胺<sup>36</sup>。

治疗起始——起始治疗方案通常从短效速释哌甲酯开始<sup>36</sup>,每日服药,虽然费用昂贵,但更实用,刺

激少。而且作为兴奋剂控制药物,一些学校不会管理它们。使用上具有灵活性,可根据需要选择不同的短效制剂或长效缓释制剂(表2)。例如,仅针对学校白天表现还是需要晚上额外地增加剂量。

滴定——根据患儿对药物反应的监测滴定至最佳剂量,应该在几周内达到理想剂量<sup>36</sup>。

监测——对服用药物的患儿进行详细和系统的随访极为重要。在每一次的剂量变化后,都应该监测药物对患儿心理和行为的影响,在随后的3个月、6个月都要进行检测。应记录身高、体重、心率和血压的变化(见框图3)。检测还应包括来自教师的

**框图3 药物治疗不良反应的管理**

#### 神经系统

头痛,易怒,头晕

减少剂量或停用

失眠

证据不一致。临床经验表明,儿童睡眠受影响的程度有相当大的个体差异性:有些人不受影响,而有些人服用兴奋剂几小时后更易入睡,还有一些人因为药物的影响无法入睡而需要调整药物或服用短效制剂<sup>77,80</sup>。

抽动

抽动不是药物治疗的禁忌,但用精神兴奋剂药物有时可使之恶化<sup>77</sup>,可以通过使用托莫西汀来改善。继续观察3个月,随着时间的推移,抽动出现自然的波动过程,而与药物无关。

癫痫

注意缺陷多动障碍(ADHD)的治疗药物可能降低癫痫的发作阈值,可在专科医生的指导下用于癫痫患儿<sup>77</sup>。

#### 心血管

血压

所有的 ADHD 治疗药物都有可能增加血压和脉搏,所以必须定期监测。在大多数情况下,变化是不显著的(平均收缩压增加 1~4 mmHg,舒张压 1~2 mmHg,脉搏 1~2 次/分),但是有小部分患儿(5%~15%)的血压和脉搏增加可能是第 95 百分位数以上(依据年龄调整袖带后 3 次测量中的 1 次),这些孩子应得到专科的照护<sup>81</sup>。

严重的心血管事件

有先天性心脏病、心脏症状史(例如运动中晕厥),或是有年龄 40 岁以下猝死的家族病史的患儿,在服用 ADHD 治疗药物时要格外小心猝死的风险。对于这些患儿,需要儿科心脏病专家指导<sup>77</sup>。

胃肠道

恶心

可以减少剂量或停用。

体重减轻和食欲减少

兴奋剂对体重和食欲的减少在使用药物前 6 个月最明显,因此最好在饭后服用(建议早上或晚上增加一些点心)。

肝损伤

可能是一种罕见的、异质性的反应,主要见于托莫西汀的可逆的不良反应<sup>83</sup>。不推荐常规的血常规筛查和监测,但如果出现腹痛、恶心、尿黄或黄疸,建议紧急治疗<sup>36</sup>。

生长

身高增长减少

兴奋剂对生长的影响,在第一个 3 年约延迟 1 cm/年<sup>77</sup>。效应可能是剂量依赖性的,当治疗停止时是可逆的。兴奋剂对最终的身高是否有影响目前还不清楚。托莫西汀对身高的影响与兴奋剂有相似的作用。如果身高测量在百分位数表上下降,那么建议减少剂量,也可以更换另一种药物或采用药物间歇疗法。如果身高显著受影响,要咨询内分泌科专家。

心理症状

精神病性症状

治疗过程可以出现罕见的妄想、幻觉、躁狂<sup>77</sup>。

自杀意念

有报道称托莫西汀可轻微增加自杀意念,所以在开始治疗时必须监测患儿的情绪。自杀意念不是药物治疗的禁忌,但是需要减少治疗剂量<sup>77</sup>。

其他

药物滥用

没有证据表明,兴奋剂药物治疗后会增加药物滥用的风险。但是一部分 ADHD 患儿可能易出现滥用兴奋剂<sup>85</sup>。右旋苯丙胺有造成药物滥用的最大风险。对于有药物滥用的高风险患儿,可以考虑使用中效的哌甲酯、二甲磺酸赖右旋苯丙胺、阿托西汀<sup>77</sup>。

性功能障碍

勃起和射精功能障碍和痛经是托莫西汀潜在的不良反应。

关于在学校如何使症状得到控制的评价。评定量表可用于监测临床和行为的改变<sup>79</sup>。

### 治疗持续的时间和共患病的治疗管理

在充分的疗效后,如果一年2次的评估提示治疗有效,药物治疗就应该持续进行。药物假期不常规推荐。决定何时停止用药,必须通知患儿和家長,在患儿和家長一致认可的情况下可以考虑。如果患儿不再想服药或父母认为他们想让孩子尝试一段时间不用药物,那么可以支持这一要求。药品在压力过度或增加的情况下不应该停(例如,换学校或参加考试)。暑假是一个可以减少剂量的时机。表3提供了更多的关于如何管理不同药物的信息。

专家建议精神科的共患病需要药物治疗。可以在哌甲酯治疗的同时,合用选择性5-羟色胺再摄取抑制剂来治疗抑郁障碍和焦虑障碍。睡眠保健是共患睡眠障碍的一线治疗。药物干预,如服用褪黑激素可能对睡眠障碍有用,但必须在专业的照护下进行。

### 附加教育资源

为卫生保健专业人员的资源

- National Institute for Health and Care Excellence guideline. Attention deficit hyperactivity disorder: diagnosis and management of ADHD in children, young people and adults (www.nice.org.uk/CG72)——evidence based guidelines on ADHD management in the UK
- Cortese S, Holtmann M, Banaschewski T, et al. Current best practice in management of adverse events during treatment with ADHD medication in children and adolescents. *J Child Psychol Psychiatry* 2013;54:227-46. <http://onlinelibrary.wiley.com/doi/10.1111/jcpp.12036/epdf>——guidelines on management of adverse effects of medication produced on behalf of the European ADHD Guidelines Group
- The NIMH-funded Multimodal Treatment of Attention Deficit Hyperactivity Disorder (MTA) study (www.nimh.nih.gov/funding/clinicaltrials-for-researchers/practical/mta/multimodal-treatment-of-attention-deficit-hyperactivity-disorder-mta-study.shtml) ——a multisite study designed to evaluate the main interventions for ADHD, including behavior therapy, drugs, and the combination of the two. First study

published in 1999 and follow-up continues

为年轻人及其家庭的资源

- The National Attention Deficit Disorder Information and Support Service UK. ADDISS (www.addiss.co.uk/)——a patient and parent support organization
- Young minds (www.youngminds.org.uk/for\_children\_young\_people/whats\_worrying\_you/adhd) ——information on ADHD tailored for young people
- American Academy of Child and Adolescent Psychiatry and American Psychiatric Association (www.parentsmedguide.org/pmg\_adhd.html)——ADHD drug information for parents
- NHS choices. Attention Deficit Hyperactivity Disorder (ADHD) (www.nhs.uk/conditions/Attention-deficit-hyperactivity-disorder/Pages/Introduction.aspx) ——includes a video clip of an interview between a psychiatrist and a child with ADHD and his parents
- Green C, Chee K. Understanding ADHD. A parent's guide to attention deficit hyperactivity disorder in children. Vermilion, 1997——a book with useful information and helpful strategies for parents and teachers
- Hoopman K. All dogs have ADHD. Jessica Kingsley, 2008 ——a useful, light hearted book illustrating some aspects of ADHD [www.healthline.com/health-slideshow/top-adhd-android-iphone-apps](http://www.healthline.com/health-slideshow/top-adhd-android-iphone-apps)——a review of some of the ADHD apps available in 2015. Healthline (www.healthline.com/health/adhd)——has information and links to a range of blogs on ADHD and selected videos on YouTube and Tedx for young people and their families
- ADHDVoices. YouTube. What's it like to have ADHD? (www.youtube.com/watch?v=H17Ro1PUJmE) ——short animated video of what it is like to have ADHD from a young person's perspective

We thank David Coghill, Tamsin Ford, Brian Green, Sandra Hallett, Ilja Holland-Kaye, Alison Maycock, Neysan Pucks, and Ruth Reed for helpful comments on earlier drafts of the review; the reviewers for their thoughtful and comprehensive comments; the BMJ editors who provided considerable input to the review, and all who in combination contributed to a much improved publication. We are grateful for permission from Professor Asherson and UKAAN for allowing us to revise a slide on ADHD impact. We thank the young adult and parent who kindly shared their experience with us.

关于作者(Contributors): NV analysed the data. MF and NV wrote the first draft of the review. NV, MF, and MP revised drafts of the paper. MF is the guarantor.

利益竞争(Competing interests): We have read and understood the BMJ policy on declaration of interests and declare the following: none.

来源与同行评议(Provenance and peer review): Not commissioned; externally peer reviewed.

参考文献见 [bmj.com](http://bmj.com) 和 [bmj.yiigle.com](http://bmj.yiigle.com)。

BMJ takes no responsibility for the accuracy of the translation from the published English language original and is not liable for any errors that may occur.

# BMJ
